# Supplementary material for: Redox-active polyimide–polyether block copolymers as electrode materials for lithium batteries
Source: Royal Society of Chemistry journal article supplement (doi:10.1039/c4ra15976d), 2015-01-01
Supplement: c4ra15976d1.pdf [file c4ra15976d1.pdf]

## Electronic Supplementary Information (ESI)

### Redox-active polyimide-polyether block copolymers as electrode materials for lithium batteries

Guiomar Hernández,<sup>a</sup> Nerea Casado,<sup>a</sup> Raphaël Coste,<sup>a,b</sup> Devaraj Shanmukaraj,<sup>c</sup> Laurent Rubatat,<sup>b</sup> Michel Armand<sup>c</sup> and David Mecerreyes<sup>\*a,d</sup>

<sup>a</sup> POLYMAT, University of the Basque Country UPV/EHU, Joxe Mari Korta Center, Avda. Tolosa 72, 20018, Donostia-San Sebastián, Spain; E-mail: david.mecerreyes@ehu.es

<sup>b</sup> UMR 5254 IPREM EPCP, Université de Pau et des Pays de l'Adour, Technopole Hélioparc, 2 av. Du Président Angot, 64053, Cedex 9 Pau, France.

<sup>c</sup> CIC EnergiGUNE, Alava Technology Park, C/Albert Einstein 48, 01510, Miñano, Álava, Spain.

<sup>d</sup> Ikerbasque, Basque Foundation for Science, E-48011 Bilbao, Spain.

#### Experimental

##### Rate performance of Naphthalene polyimide-b-PEO2000.

Rate performance of polyimide Naphthalene polyimide-b-PEO2000 was tested under current rates of 1Li<sup>+</sup>/5h and 1Li<sup>+</sup>/1h (Fig. S1). Discharge capacity at 1Li<sup>+</sup>/5h was 170 mAh·g<sup>-1</sup> whereas at 1Li<sup>+</sup>/1h it was 138 mAh·g<sup>-1</sup>, capacity remained 81% at higher rates showing a good rate performance for the polyimide with higher PEO molecular weight.

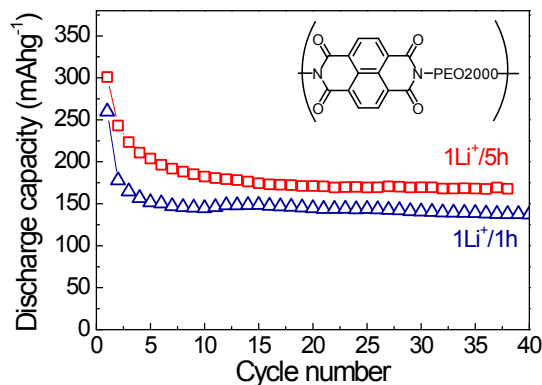

**Fig. S1** Discharge capacities of Naphthalene polyimide-b-PEO2000 under 1Li<sup>+</sup>/5h (□) and 1Li<sup>+</sup>/1h (Δ) current rates versus cycle number.
